# Supplementary material for: Patterns of white matter hyperintensities associated with cognition in middle-aged cognitively healthy individuals
Source: PubMed Central journal article supplement (PMC7572336; doi:10.1007/s11682-019-00151-2), 2019-07-05
Supplement: 11682_2019_151_MOESM1_ESM.pdf [file 11682_2019_151_MOESM1_ESM.pdf]

## Supplementary Material

### **PATTERNS OF WHITE MATTER HYPERINTENSITIES ASSOCIATED WITH COGNITION IN MIDDLE-AGED COGNITIVELY HEALTHY INDIVIDUALS**

Anna Brugulat-Serrat<sup>1\*</sup>, Gemma Salvadó<sup>1\*</sup>, Carole H. Sudre<sup>2,3</sup>, Oriol Grau-Rivera<sup>1</sup>, Marc Suárez-Calvet<sup>1</sup>, Carles Falcon<sup>1,4</sup>, Gonzalo Sánchez-Benavides<sup>1</sup>, Nina Gramunt<sup>1</sup>, Karine Fauria<sup>1</sup>, M. Jorge Cardoso<sup>2,3</sup>, Frederik Barkhof<sup>5,6,7</sup>, José Luis Molinuevo<sup>1,8§</sup>, Juan Domingo Gispert<sup>1,4,9 §</sup>, for the ALFA Study†

- 1) Barcelonaβeta Brain Research Center, Pasqual Maragall Foundation, Barcelona, Spain
- 2) School of Biomedical Engineering and Imaging Sciences, King's College London, London, UK,
- 3) Dementia Research Centre, UCL, London, UK,
- 4) Centro de Investigación Biomédica en Red de Bioingeniería, Biomateriales y Nanomedicina (CIBER-BBN), Madrid, Spain
- 5) Translational Imaging Group, CMIC, UCL, London, UK
- 6) Brain Repair and Rehabilitation, UCL Institute of Neurology, London, UK,
- 7) Radiology & Nuclear Medicine, VU University Medical Centre, Amsterdam, Netherland,
- 8) Centro de Investigación Biomédica en Red de Fragilidad y Envejecimiento Saludable (CIBERFES), Madrid, Spain
- 9) Universitat Pompeu Fabra, Barcelona, Spain

\* These authors contributed equally to this article

† The complete list of collaborators of the ALFA Study can be found in the acknowledgements section

§ Corresponding authors:

Juan Domingo Gispert López

Barcelonaβeta Brain Research Center and Pasqual Maragall Foundation, Wellington 30, 08003 Barcelona, Spain. Tel.: +34 933160990; Fax: +34 932275783. E-mail: [jdgispert@barcelonabeta.org](mailto:jdgispert@barcelonabeta.org)

José Luis Molinuevo

Barcelonaβeta Brain Research Center and Pasqual Maragall Foundation, Wellington 30, 08003 Barcelona, Spain. Tel.: +34 933160990; Fax: +34 932275783. E-mail: [jlmolinuevo@barcelonabeta.org](mailto:jlmolinuevo@barcelonabeta.org)

| <b>Table S1. Correlation between global WMH load and cognition</b>                               |                         |                 |
|--------------------------------------------------------------------------------------------------|-------------------------|-----------------|
|                                                                                                  | <b>Rho [95% CI]</b>     | <b><i>p</i></b> |
| <b>Cognitive z-score composites</b>                                                              |                         |                 |
| Memory                                                                                           | -0.07 [-0.151 - 0.012]  | 0.04            |
| Executive Function                                                                               | -0.07 [-0.151 - 0.012]  | 0.04            |
| <b>Memory Binding Test</b>                                                                       |                         |                 |
| Total Free Recall                                                                                | -0.05 [-0.132 - 0.033]  | 0.12            |
| Total Delayed Free Recall                                                                        | -0.07 [-0.151 - 0.012]  | 0.05            |
| Total Paired Recall                                                                              | -0.05 [-0.132 - 0.033]  | 0.13            |
| Total Delayed Paired Recall                                                                      | -0.07 [-0.151 - 0.012]  | 0.04            |
| Paired Recall Pairs                                                                              | -0.06 [-0.142 - 0.022]  | 0.07            |
| Pairs in Delayed Free Recall                                                                     | -0.08 [-0.161 - 0.002]  | 0.02            |
| Semantic Proactive Interference                                                                  | -0.08 [-0.161 - 0.002]  | 0.02            |
| <b>Subtests of WAIS-IV</b>                                                                       |                         |                 |
| Digit Span Forward                                                                               | -0.01 [-0.092 - 0.072]  | 0.43            |
| Digit Span Backward                                                                              | -0.09 [-0.171 - -0.008] | 0.01            |
| Digit Span Sequencing                                                                            | 0.03 [-0.052 - 0.112]   | 0.28            |
| Coding                                                                                           | -0.06 [-0.142 - 0.022]  | 0.09            |
| Visual Puzzles                                                                                   | -0.01 [-0.092 - 0.072]  | 0.39            |
| Matrix Reasoning                                                                                 | -0.05 [-0.132 - 0.033]  | 0.12            |
| Similarities                                                                                     | -0.06 [-0.142 - 0.022]  | 0.07            |
| Adjusted by age, education, sex, number of APOE-ε4 alleles and MTA.<br>WMH also adjusted by TIV. |                         |                 |

**Table S1.** Correlation between global WMH load and cognition correcting by age, education, sex, number of APOE-ε4 alleles, TIV and MTA. Abbreviations: TIV, total intracranial volume; MTA, medial temporal atrophy.

| <b>Table S2. Correlation between global WMH load and cognition</b>                                         |                         |                 |
|------------------------------------------------------------------------------------------------------------|-------------------------|-----------------|
|                                                                                                            | <b>Rho [95% CI]</b>     | <b><i>p</i></b> |
| <b>Cognitive z-score composites</b>                                                                        |                         |                 |
| Memory                                                                                                     | -0.07 [-0.151 - 0.012]  | 0.04            |
| Executive Function                                                                                         | -0.07 [-0.151 - 0.012]  | 0.05            |
| <b>Memory Binding Test</b>                                                                                 |                         |                 |
| Total Free Recall                                                                                          | -0.05 [-0.132 - 0.033]  | 0.11            |
| Total Delayed Free Recall                                                                                  | -0.07 [-0.151 - 0.012]  | 0.04            |
| Total Paired Recall                                                                                        | -0.05 [-0.132 - 0.033]  | 0.13            |
| Total Delayed Paired Recall                                                                                | -0.07 [-0.151 - 0.102]  | 0.03            |
| Paired Recall Pairs                                                                                        | -0.06 [-0.142 - 0.022]  | 0.06            |
| Pairs in Delayed Free Recall                                                                               | -0.09 [-0.171 - -0.008] | 0.02            |
| Semantic Proactive Interference                                                                            | -0.08 [-0.161 - 0.002]  | 0.03            |
| <b>Subtests of WAIS-IV</b>                                                                                 |                         |                 |
| Digit Span Forward                                                                                         | -0.01[-0.092 - 0.072]   | 0.40            |
| Digit Span Backward                                                                                        | -0.09 [-0.171 - -0.008] | 0.02            |
| Digit Span Sequencing                                                                                      | 0.04 [-0.042 - 0.122]   | 0.21            |
| Coding                                                                                                     | -0.06 [-0.142 - 0.022]  | 0.08            |
| Visual Puzzles                                                                                             | -0.01 [-0.092 - 0.072]  | 0.38            |
| Matrix Reasoning                                                                                           | -0.05 [-0.132 - 0.033]  | 0.13            |
| Similarities                                                                                               | -0.05 [-0.132 - 0.033]  | 0.13            |
| Adjusted by age, education, sex, number of APOE-ε4 alleles and CAIDE risk score. WMH also adjusted by TIV. |                         |                 |

**Table S2.** Correlation between global WMH load and cognition correcting by age, education, sex, number of APOE-ε4 alleles, TIV and CAIDE. Abbreviations: TIV, total intracranial volume; CAIDE, Cardiovascular Risk Factors, Aging, and Incidence of Dementia.

**Table S3. Correlation between global WMH load and cognition**

|                                                                                                                        | <b>Rho [95% CI]</b>     | <b><i>p</i></b> |
|------------------------------------------------------------------------------------------------------------------------|-------------------------|-----------------|
| <b>Cognitive z-score composites</b>                                                                                    |                         |                 |
| Memory                                                                                                                 | -0.08 [-0.161 - 0.002]  | 0.03            |
| Executive Function                                                                                                     | -0.07 [-0.151 - 0.012]  | 0.05            |
| <b>Memory Binding Test</b>                                                                                             |                         |                 |
| Total Free Recall                                                                                                      | -0.05 [-0.132 - 0.033]  | 0.11            |
| Total Delayed Free Recall                                                                                              | -0.07 [-0.151 - 0.012]  | 0.05            |
| Total Paired Recall                                                                                                    | -0.06 [-0.142 - 0.022]  | 0.09            |
| Total Delayed Paired Recall                                                                                            | -0.08 [-0.161 - 0.002]  | 0.03            |
| Paired Recall Pairs                                                                                                    | -0.07 [-0.151 - 0.012]  | 0.05            |
| Pairs in Delayed Free Recall                                                                                           | -0.09 [-0.171 - -0.008] | 0.01            |
| Semantic Proactive Interference                                                                                        | -0.08 [-0.161 - 0.002]  | 0.03            |
| <b>Subtests of WAIS-IV</b>                                                                                             |                         |                 |
| Digit Span Forward                                                                                                     | -0.01[-0.092 - 0.072]   | 0.40            |
| Digit Span Backward                                                                                                    | -0.09 [-0.171 - -0.008] | 0.02            |
| Digit Span Sequencing                                                                                                  | 0.02 [-0.062 - 0.102]   | 0.31            |
| Coding                                                                                                                 | -0.06 [-0.142 - 0.022]  | 0.08            |
| Visual Puzzles                                                                                                         | -0.01 [-0.092 - 0.072]  | 0.38            |
| Matrix Reasoning                                                                                                       | -0.05 [-0.132 - 0.033]  | 0.13            |
| Similarities                                                                                                           | -0.05 [-0.132 - 0.033]  | 0.11            |
| Adjusted by age, education, sex, number of APOE-ε4 alleles and Goldberg depression subscale. WMH also adjusted by TIV. |                         |                 |

**Table S3.** Correlation between global WMH load and cognition correcting by age, education, sex, number of APOE-ε4 alleles, TIV and Goldberg depression subscale. Abbreviations: TIV, total intracranial volume.

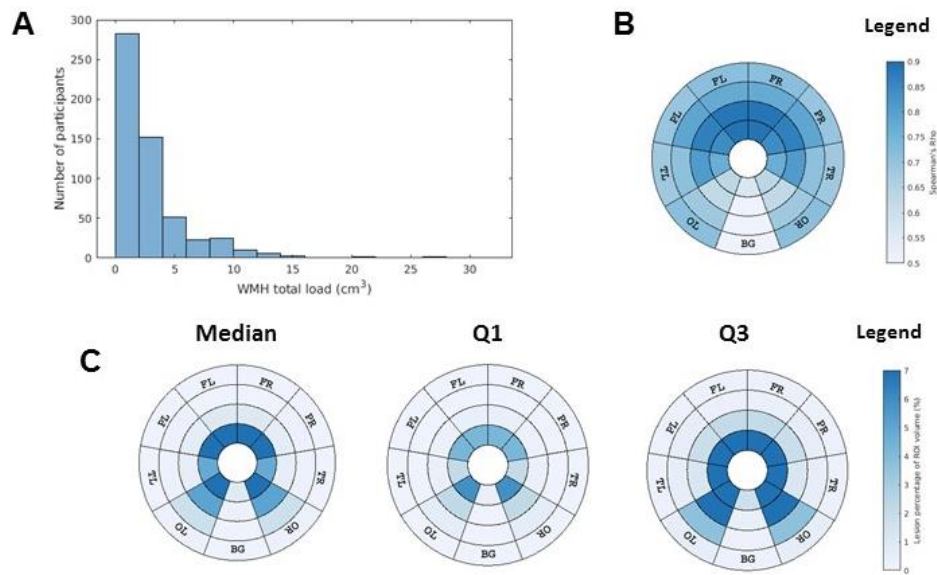

**Figure S1.** A) Frequency Distribution of WMH load for all the participants in the analyses (N=561) B) Correlation between global and regional WMH lesion C) WMH percentage of ROI volume in each region.

FR: frontal right, FL: frontal left, TR: temporal right, TL: temporal left, PR: parietal right, PL: parietal left, OR: occipital right, OL: occipital left, BG: basal ganglia, Q1: first interquartile and Q3: third interquartile.

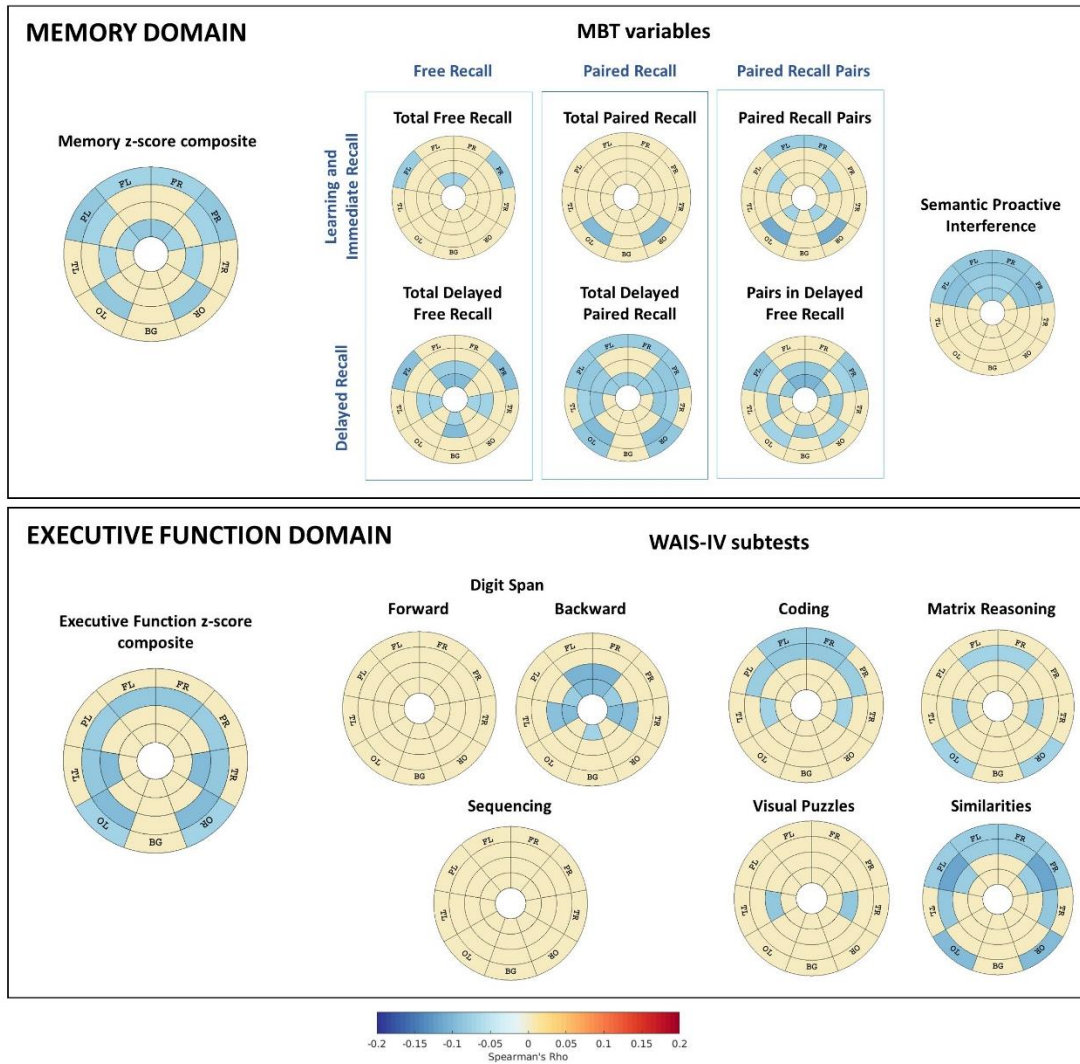

**Fig. S2: Regional patterns of correlation between cognition and WMH correcting by age, education, sex, number of APOE- $\epsilon$ 4 alleles, TIV and MTA.** Effect sizes of these correlation measures by Spearman's Rho are shown in those areas that presented statistical significant association ( $p < 0.05$ ). All the other regions are depicted in beige. Cognition and WMH were adjusted by age, sex, education, number of APOE- $\epsilon$ 4 alleles and MTA. WMH were also adjusted by TIV.

Abbreviations: FR, frontal right; FL, frontal left; TR, temporal right; TL: temporal left; PR, parietal right; PL, parietal left; OR, occipital right; OL, occipital left; BG, basal ganglia; WMH, white matter hyperintensities; MTA, medial temporal atrophy; TIV, total intracranial volume.

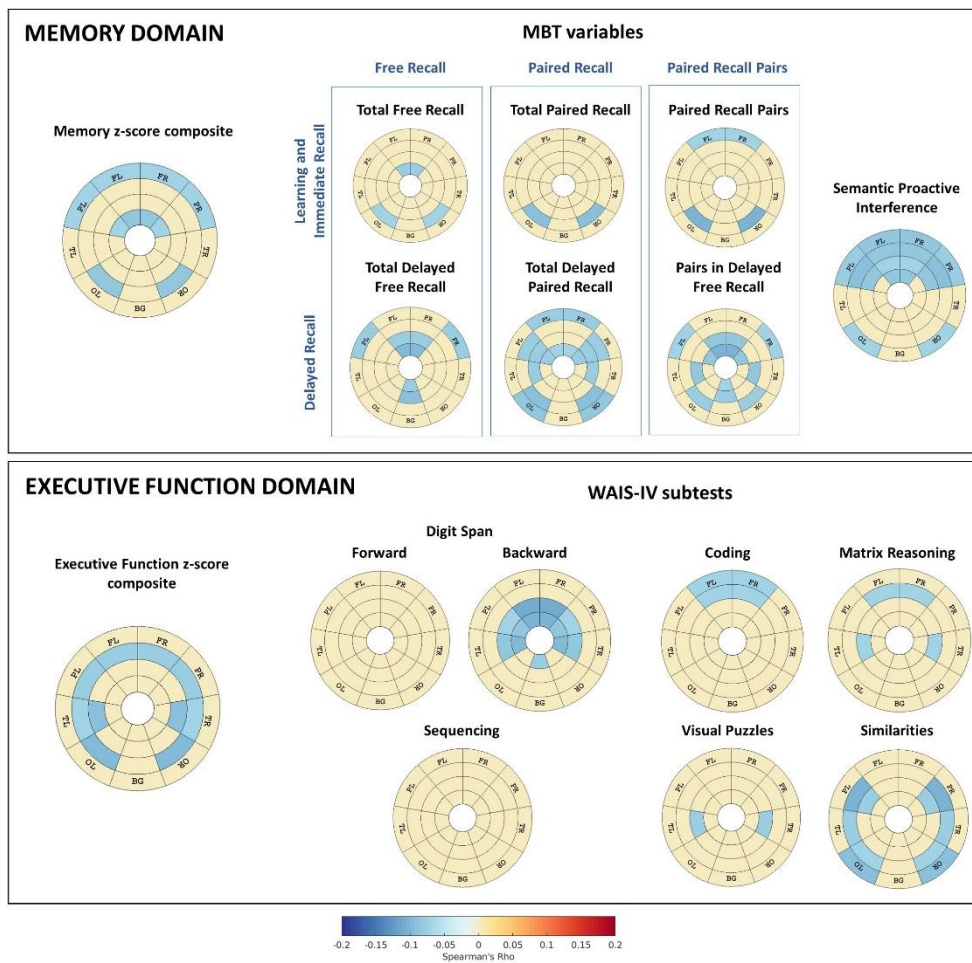

**Fig. S3: Regional patterns of correlation between cognition and WMH correcting by age, education, sex, number of APOE- $\epsilon$ 4 alleles, TIV and CAIDE-I.** Effect sizes of these correlation measures by Spearman's Rho are shown in those areas that presented statistical significant association ( $p < 0.05$ ). All the other regions are depicted in beige. Cognition and WMH were adjusted by age, sex, education, number of APOE- $\epsilon$ 4 alleles and CAIDE-I. WMH were also adjusted by TIV.

Abbreviations: FR, frontal right; FL, frontal left; TR, temporal right; TL: temporal left; PR, parietal right; PL, parietal left; OR, occipital right; OL, occipital left; BG, basal ganglia; WMH, white matter hyperintensities; CAIDE, Cardiovascular Risk Factors; TIV, total intracranial volume.

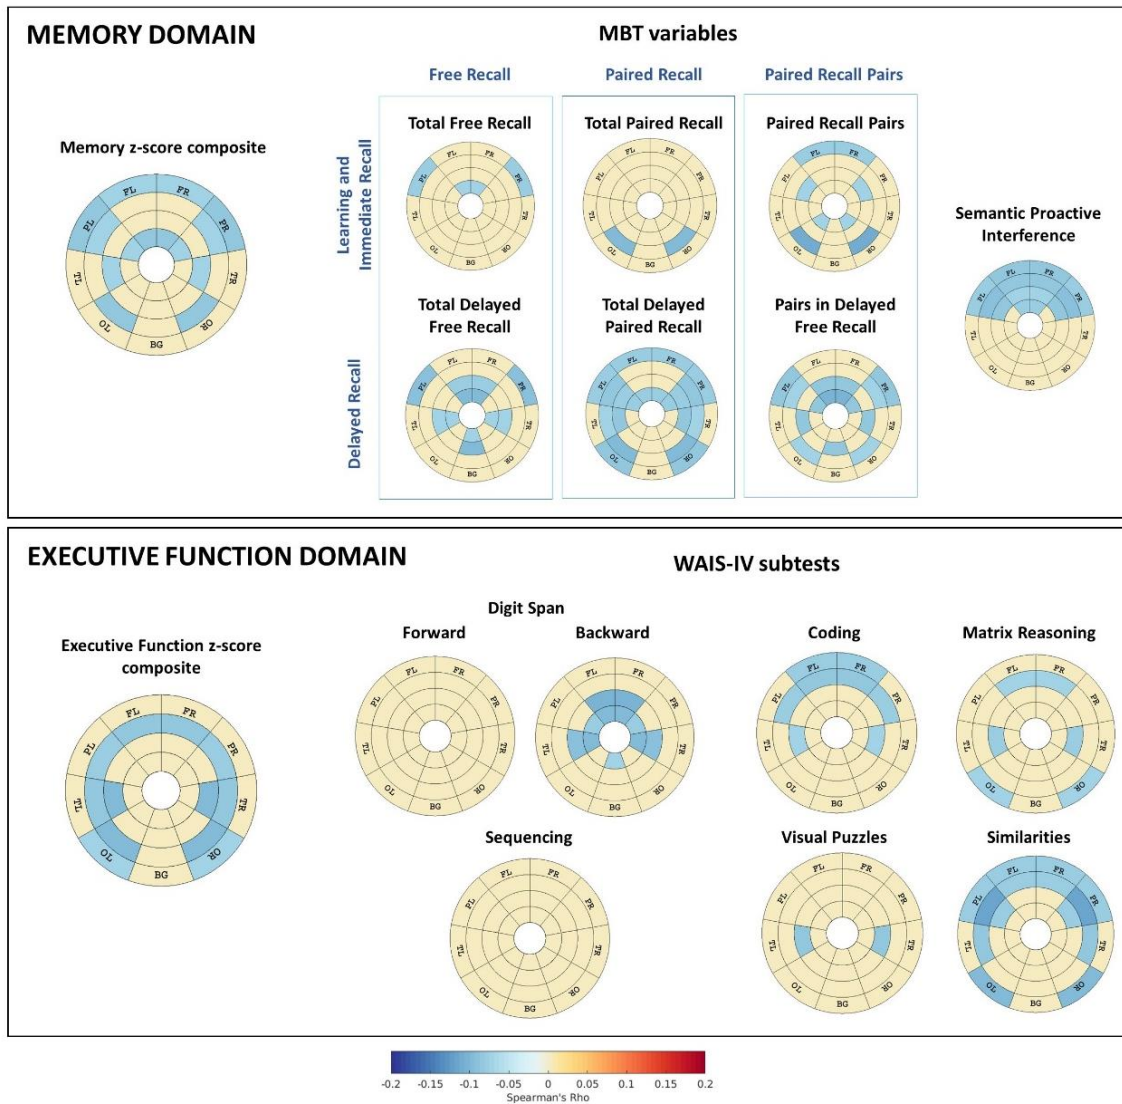

**Fig. S4: Regional patterns of correlation between cognition and WMH correcting by age, education, sex, number of APOE- $\epsilon$ 4 alleles, TIV and Goldberg depression subscale.** Effect sizes of these correlation measures by Spearman's Rho are shown in those areas that presented statistical significant association ( $p < 0.05$ ). All the other regions are depicted in beige. Cognition and WMH were adjusted by age, sex, education, number of APOE- $\epsilon$ 4 alleles and Goldberg depression subscale. WMH were also adjusted by TIV.

Abbreviations: FR, frontal right; FL, frontal left; TR, temporal right; TL: temporal left; PR, parietal right; PL, parietal left; OR, occipital right; OL, occipital left; BG, basal ganglia; WMH, white matter hyperintensities; CAIDE, Cardiovascular Risk Factors; TIV, total intracranial volume.
